# Supplementary material for: Postmarketing observational study on the safety of 2021/2022 and 2022/2023 influenza vaccination campaigns in Italy: TheShinISS-Vax|Flu study protocol
Source: PubMed Central journal article supplement — BMJ Open. 2023 Aug 7;13(8):e069858. doi: 10.1136/bmjopen-2022-069858 (PMC10407352; doi:10.1136/bmjopen-2022-069858), 2023-08-07
Supplement: bmjopen-2022-069858supp001.pdf [file bmjopen-2022-069858supp001.pdf]

Post-marketing observational study on the safety of 2021/2022 and 2022/2023 influenza vaccination campaigns in Italy: TheShinISS-Vax|Flu study protocol  
Spila Alegiani S & Morciano C et al.

Supplemental Table 1. Time schedule of TheShinISS-Vax|Flu

| GANTT                       | 2022 |      |      |      |      |      |      | 2023 |      |      |      |     |      |      |      |      |      |      |      |
|-----------------------------|------|------|------|------|------|------|------|------|------|------|------|-----|------|------|------|------|------|------|------|
|                             | Jun. | Jul. | Aug. | Sep. | Oct. | Nov. | Dec. | Jan. | Feb. | Mar. | Apr. | May | Jun. | Jul. | Aug. | Sep. | Oct. | Nov. | Dec. |
|                             | 1    | 2    | 3    | 4    | 5    | 6    | 7    | 8    | 9    | 10   | 11   | 12  | 13   | 14   | 15   | 16   | 17   | 18   | 19   |
| Pre-study procedures        |      |      |      |      |      |      |      |      |      |      |      |     |      |      |      |      |      |      |      |
| Protocol Drafting           |      |      |      |      |      |      |      |      |      |      |      |     |      |      |      |      |      |      |      |
| Customizing TheShinISS      |      |      |      |      |      |      |      |      |      |      |      |     |      |      |      |      |      |      |      |
| Study organization          |      |      |      |      |      |      |      |      |      |      |      |     |      |      |      |      |      |      |      |
| Ethics Committee            |      |      |      |      |      |      |      |      |      |      |      |     |      |      |      |      |      |      |      |
| Region participation        |      |      |      |      |      |      |      |      |      |      |      |     |      |      |      |      |      |      |      |
| <b>2021-2022 campaign</b>   |      |      |      |      |      |      |      |      |      |      |      |     |      |      |      |      |      |      |      |
| Data collection             |      |      |      |      |      |      |      |      |      |      |      |     |      |      |      |      |      |      |      |
| Interim analysis and report |      |      |      |      |      |      |      |      |      |      |      |     |      |      |      |      |      |      |      |
| Analysis and final report   |      |      |      |      |      |      |      |      |      |      |      |     |      |      |      |      |      |      |      |
| <b>2022-2023 campaign</b>   |      |      |      |      |      |      |      |      |      |      |      |     |      |      |      |      |      |      |      |
| Data collection             |      |      |      |      |      |      |      |      |      |      |      |     |      |      |      |      |      |      |      |
| Analysis and final report   |      |      |      |      |      |      |      |      |      |      |      |     |      |      |      |      |      |      |      |
